# Supplementary material
Source: publisher figshare collection journal article supplement (https://wiley.figshare.com/articles/dataset/_/3531908)
Supplement: Supplementary file 2 [file 1 › appendix-C.htm]

Ecological Archives E090-188-A3


### *Ecological Archives* E090-188-A3

### **Murray G. Efford, Deanna K. Dawson, and David L. Borchers. 2009. Population density estimated from locations of individuals on a passive detector array. *Ecology* 90:2676–2682.**

Appendix C. Simulations to compare spatially explicit population estimates from signal-strength and binary detection models.

> View / download PDF.

---


[Back to E090-188]
